# Supplementary material for: Two-dimensional electronic structure for high thermoelectric performance in halide perovskite Cs2Au(i)Au(iii)I6
Source: Royal Society of Chemistry journal article supplement (doi:10.1039/d2cp02435g), 2022-01-01
Supplement: d2cp02435g1.pdf [file d2cp02435g1.pdf]

## Two-dimensional electronic structure for high thermoelectric performance in halide perovskite $\text{Cs}_2\text{Au(I)Au(III)I}_6$

Junyan Liu<sup>1</sup>, Gang Tang<sup>2</sup>, Jinjian Zhou<sup>3\*</sup>, Jiawang Hong<sup>1\*</sup>

<sup>1</sup>*School of Aerospace Engineering, Beijing Institute of Technology, Beijing, 100081, China*

<sup>2</sup>*Advanced Research Institute of Multidisciplinary Science, Beijing Institute of Technology, Beijing 100081, China*

<sup>3</sup>*School of Physics, Beijing Institute of Technology, Beijing, 100081, China*

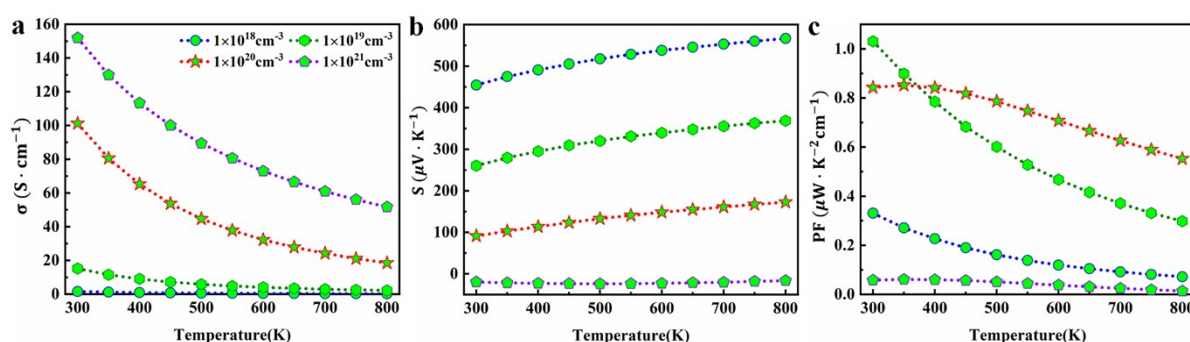

**Fig.S1** Out-of-plane electrical transport coefficients for *p*-type  $\text{Cs}_2\text{Au(I)Au(III)I}_6$  as functions of temperature and hole concentration, (a) electrical conductivity, (b) Seebeck coefficient and (c) power factor.

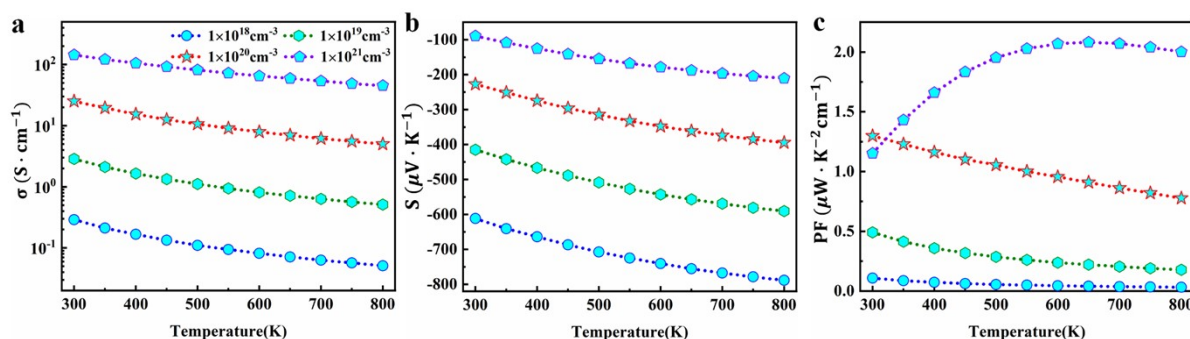

**Fig.S2** Out-of-plane electrical transport coefficients for *n*-type  $\text{Cs}_2\text{Au(I)Au(III)I}_6$  as functions of temperature and electron concentration, (a) electrical conductivity, (b) Seebeck coefficient and (c) power factor.

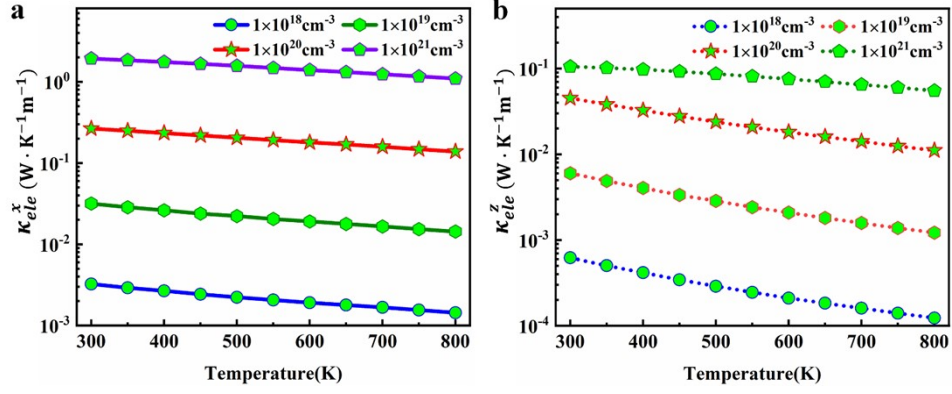

**Fig.S3** (a) In-plane and (b) out-of-plane electrical thermal conductivity as functions of temperature and carrier concentration for *p*-type  $\text{Cs}_2\text{Au(I)Au(III)I}_6$ .

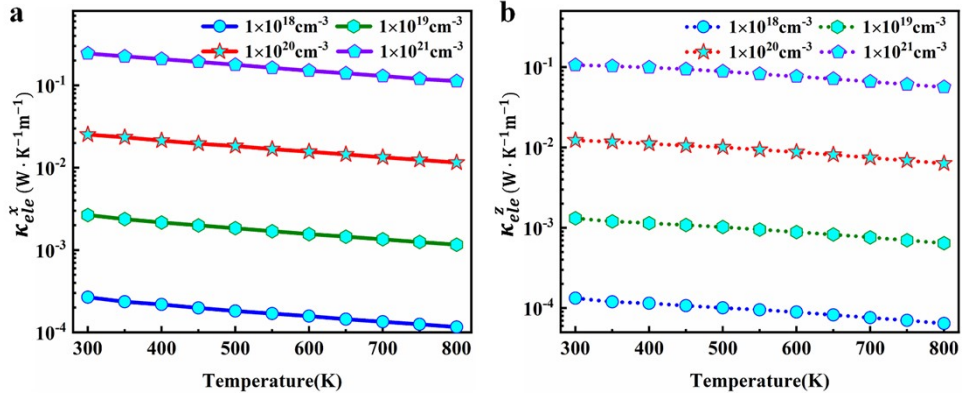

**Fig.S4** (a) In-plane and (b) out-of-plane electrical thermal conductivity as functions of temperature and carrier concentration for *n*-type  $\text{Cs}_2\text{Au(I)Au(III)I}_6$ .

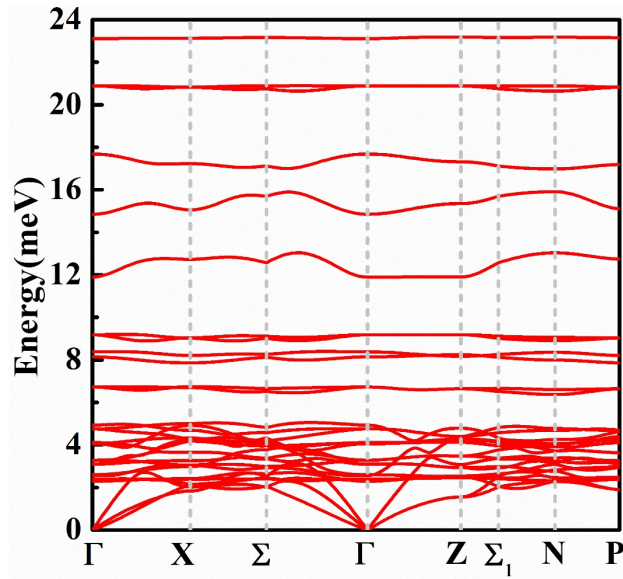

**Fig.S5** Phonon dispersion of  $\text{Cs}_2\text{Au(I)Au(III)I}_6$ .
